# Supplementary material for: Estrogen receptor α in cancer associated fibroblasts suppresses prostate cancer invasion via reducing CCL5, IL6 and macrophage infiltration in the tumor microenvironment
Source: PubMed Central journal article supplement (PMC4721150; doi:10.1186/s12943-015-0488-9), 2016-01-20

Yeh *et al.*, Supplementary Fig. 4.

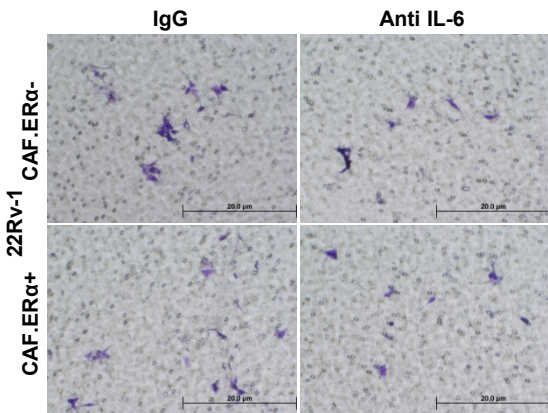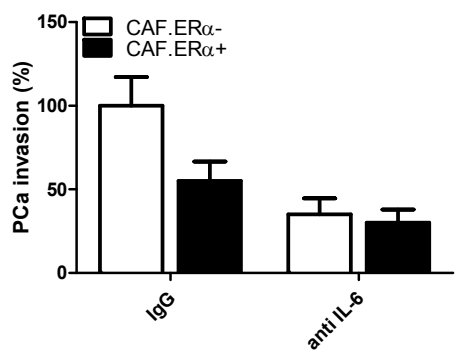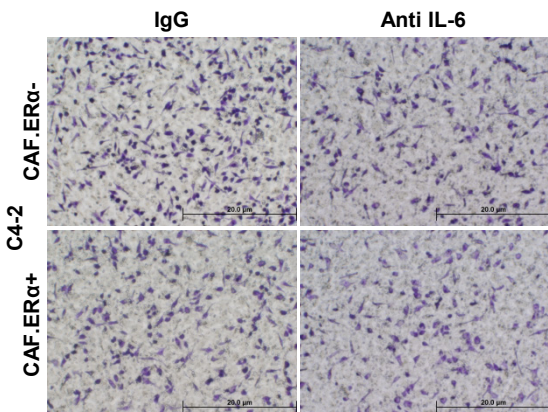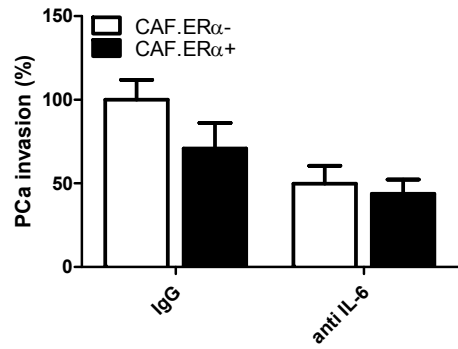

Supplement: 12943_2015_488_MOESM4_ESM.pdf [file 12943_2015_488_MOESM4_ESM.pdf]
