# Supplementary material for: Estrogen receptor α in cancer associated fibroblasts suppresses prostate cancer invasion via reducing CCL5, IL6 and macrophage infiltration in the tumor microenvironment
Source: Springer Nature journal article supplement (doi:10.1186/s12943-015-0488-9), 2016-01-20

Yeh *et al.*, Supplementary Fig. 5.

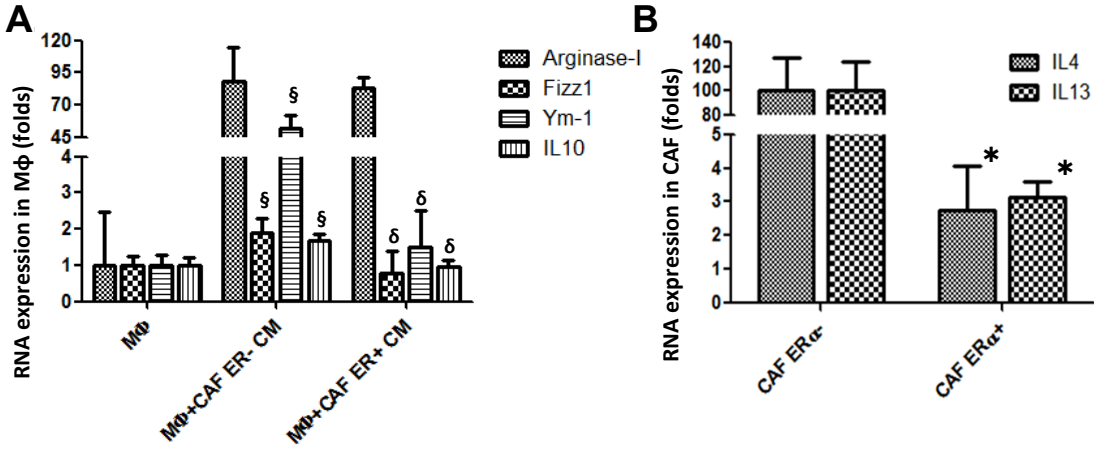

Supplement: MOESM5 [file 9763330]
